# Supplementary material for: Dental calculus evidence of Taï Forest Chimpanzee plant consumption and life history transitions
Source: PubMed Central journal article supplement (PMC4611876; doi:10.1038/srep15161), 2015-10-19
Supplement: srep15161-s1.pdf [file srep15161-s1.pdf]

1 **Supplementary Information for: “Dental calculus evidence of Tai Forest Chimpanzee plant**  
2 **consumption and life history transitions”**

3 Robert C Power<sup>1\*</sup>, Domingo C Salazar-García<sup>2,3,4</sup>, Roman M Wittig<sup>5,6</sup>, Martin Freiberg<sup>7</sup>, Amanda  
4 G Henry<sup>1</sup>

5 <sup>1</sup>Max Planck Research Group on Plant Foods in Hominin Dietary Ecology, Max Planck Institute for Evolutionary  
6 Anthropology, Deutscher Platz 6, 04103 Leipzig, Germany.

7 <sup>2</sup>Department of Archaeology, University of Cape Town, Cape Town, South Africa.

8 <sup>3</sup>Departament de Prehistòria y Arqueologia, Universitat de València, València, Spain.

9 <sup>4</sup>Department of Human Evolution, Max-Planck Institute for Evolutionary Anthropology, Deutscher Platz 6, 04103  
10 Leipzig, Germany.

11 <sup>5</sup>Department of Primatology, Max Planck Institute for Evolutionary Anthropology, Deutscher Platz 6  
12 04103 Leipzig, Germany.

13 <sup>6</sup>Centre Suisse de Recherches Scientifiques, Abidjan, Cote d'Ivoire

14 <sup>7</sup>Institute of Botany, University of Leipzig, 04103 Leipzig, Germany.

15 \*Corresponding author

16 +49 (0)341 3550 789 / +49 (0)15237044289

17 [robert\\_power@eva.mpg.de](mailto:robert_power@eva.mpg.de)

18  
19  
20  
21 **Supplementary Texts**

22  
23 1. Study population

24  
25 The chimpanzee calculus samples derive from the Tai Chimpanzee osteology collection of 77  
26 chimpanzees curated at the Max Planck Institute for Evolutionary Anthropology (MPI-EVA) in  
27 Leipzig, Germany. The remains were collected with as many details as possible on sex, age and  
28 cause of death. All Tai Forest material and data collected complied with the requirements and  
29 guidelines of the Ministère de l'Enseignement Supérieure et de la Recherche Scientifique of  
30 Côte d'Ivoire, and adhered to its legal requirements. When possible we sampled chimpanzees  
31 who had known life histories, and ideally with comprehensive dietary records. Much of the  
32 observational data relates to chimpanzees that are not part of this osteology collection. Dietary  
33 records vary from thousands of observations over a decade to a limited number over the  
34 course of a single day. After death, these individuals were interred for defleshing and then later  
35 exhumed. Some of the skeletal material was cleaned using strong disinfectants before storage  
36 to minimize the risk of disease transmission.

37  
38 It has been noted that chimpanzees produce less salivary  $\alpha$ -amylase than humans, especially  
39 humans from agricultural societies that consume high levels of starch<sup>1</sup>. Thus starch entering the  
40 chimpanzee mouth may be less readily hydrolysed than in human groups, which may make it  
41 more likely for starches to enter and preserve in chimpanzee dental calculus than in human

42 dental calculus. However if this patterns occurs in our samples it is unclear and it cannot  
43 testable with our data.

44

## 45 2. Collection of calculus samples

46

47 Occasionally, chimpanzee calculus showed substantial flecks of dark material that did not  
48 resemble calculus and appeared to be sediment contamination. Chimpanzee samples where  
49 sediment contamination was suspected were omitted. All chimpanzee remains sampled are  
50 curated at the Max Planck Institute for Evolutionary Anthropology in Leipzig, Germany. Samples  
51 from two chimpanzees (Vanessa and 13438) were omitted from analysis because their age at  
52 death was not recorded, though we did count microremains recovered from these individuals in  
53 the Supplementary Data 3. A sample from a further chimpanzee (Loukoum) was omitted due to  
54 surface adherents on the calculus. The calculus we chose for the final complete analysis came  
55 from molars of 24 individuals (12 male and 12 female) ranging in age from between 12 and 552  
56 months (1 and 46 years) old (Table 1; Supplementary Table 3).

57

## 58 3. *Tai Forest plant reference collection*

59

60 A microremain reference collection with 119 plant species was built using the most frequently  
61 consumed chimpanzee plant foods in the Tai forest (Supplementary Table 7). Tai chimpanzees  
62 consume a particularly diverse range of foods. We collected plant parts that were documented  
63 as a specific component of the diet (fruits, seeds, piths, leaves, stems, bark, flowers, and roots.)  
64 We also include fungal fruiting bodies known to be consumed. Effort was made to include other  
65 rainforest edible plants not recorded as chimpanzee foods. Although our reference collection is  
66 not exhaustive, it incorporates the most important plants foods of the Tai chimps, achieving  
67 coverage of 89 % of the total dietary observations. Plants collected in the Tai Forest were  
68 immediately preserved onsite either by freezing or by drying in 15 or 50 ml centrifuge tubes  
69 with silica gel (Roth - T858.1 and P077.1, Karlsruhe, Germany). Additionally, we collected some  
70 plant material from the University of Leipzig Botanical Garden (marked as fresh in Supp. Table  
71 7) and analysed this material fresh for starch or dried for phytoliths. We did not make a  
72 reference collection for unsilicified plant microremains as these microremains are unlikely to be  
73 undiagnostic.

74

75 Starch was analysed by directly mounting finely sliced dry plant material on slides with  
76 approximately 10 µl of distilled water and 10 µl of a 25 % glycerol solution. Starches were  
77 observed at 200-640 x magnification using a Zeiss Axioscope. Phytoliths were isolated from  
78 plant material by dissolving weighed dried plant material in ≥65 % nitric acid with a heating

79 block to expedite the reaction. Small quantities of potassium chlorate were added to encourage  
80 the process.

81

82 In most chimpanzee foods we observed either very few starch grains or none at all, suggesting  
83 quantities too negligible to be detected or a complete lack of starch in the plant  
84 (Supplementary Table 2). Plants that produced negligible numbers of starches were not  
85 analysed for the identification model, because they did not have enough starch grains to build a  
86 reference set of 50 starches. We found phytoliths were common in many species, but many  
87 morphotypes are poorly studied in morphometric studies and cannot be easily described using  
88 the variables we chose for our model (e.g. hair cells, epidermal, cylindroids, plates and tracheid  
89 phytoliths). These morphotypes were found in a number of genera in the reference collection  
90 plant but only in low numbers.

91

92 Plants that had few phytoliths were not included. Furthermore, if microremains were found in  
93 parts of a plant that chimpanzees do not eat, the plants were not included (e.g. starch from  
94 *Beilschmedia mannii* seed). Thirteen starch- and seven phytolith-producing plants were  
95 selected for developing identification criteria. We chose to measure or quantify several  
96 variables on 50 microremains per species (Supplementary Data 1 and 2), focusing on variables  
97 that past studies have shown to be effective in distinguishing among starches and phytoliths<sup>2,3</sup>.  
98 Our variables include max length, max width, area, shape, surface regularity, the number of  
99 echinate spines, length of longest cross axis, type, number and length of cracks, number of  
100 facets and lamellae (Supplementary Table 8). If abundant starches or phytoliths were  
101 recovered, their abundance was analysed in order to assess the expected starch and phytolith  
102 contribution to dental calculus (Table 1). Starch content was established by combining previous  
103 nutritional content studies<sup>4,5</sup>. For species where this data was not available we assessed starch  
104 content per gram dried plant material colourimetrically using an Amyloglucosidase /  $\alpha$ -amylase  
105 method with a Megazyme Total Assay Kit (AA/AMG 11/01, AOAC Method 996.11, AACC  
106 Method 76.13, ICC Standard Method No. 168). Phytolith content was estimated by calculating  
107 the total weight of sample left after nitric acid digestion.

108

#### 109 *4. Identification of microremains by classification*

110

111 Statistical approaches are increasingly used for the study and classification of microremains<sup>2,6-9</sup>.  
112 A variety of approaches have been implemented in past studies such as image analysis<sup>10</sup>, linear  
113 discrimination<sup>3</sup>, and factor regression analysis by principal components<sup>2</sup>. We used random  
114 forest-based classification because it is robust, non-parametric and easily accommodates both  
115 large number of variables and categorical data. Using this approach, we can easily see the most  
116 important variables that drive the differences among the microremain types. The most

117 important variables in our phytolith model include length and the number of spines  
118 (Supplementary Table 8). In the starch random forest model area and length were the most  
119 important variables (Supplementary Table 9).

120

## 121 5. Model design and formulae

122

123 We predicted that number of microremains should increase with age, and might vary by sex.  
124 We tested this using a negative binomial regression, with microremain count as the response,  
125 and age and sex as predictors, weighting each observation by the weight of the calculus sample  
126 (see detailed methods below). We ran separate tests for phytoliths, unsilicified remains and  
127 starches.

128 The models described in R terminology are as follows:

129

130 Microremain type count ~ chimpanzee age + chimpanzee sex, weights=calculus sample weight

131

132 Expressed as a mathematical formula, this analysis is written as follows:

$$y_i = \text{Negbin}(\mu_i, k)$$

$$133 \log(\mu_j) = \beta_0 + X_j\beta_j + \varepsilon$$

134 where  $\beta_0 = 0$

$$\log(\mu_j) = \beta_0 + \sum_{j=1}^p [\beta_{11j}\text{chimp\_age}_j + \beta_{12j}\text{chimpanzee sex}_j] + \varepsilon_j$$

135 where  $\beta_0 = 0$

136

137 We predicted that more frequently consumed plants should be highly represented in the  
138 chimpanzee calculus. To test this, we used an observational random effect Poisson model  
139 (Supplementary Text 5). The count of microremains (starches or phytoliths) belonging to a  
140 particular genus was our response variable, and the fixed predictors were: (a) minutes spent  
141 consuming each genus, and (b) chimpanzee age in months. Sex was included as a control  
142 predictor, and both calculus sample weight and successful identification rate of each genus  
143 were included as weights. We accounted for the variation in production of microremains in  
144 different genera by using microremains content as an offset. We used counts of each genus  
145 predicted to be present with the total minutes spent consuming each genus. The chimpanzee  
146 individual was included as a random slope term, while year of death, tooth and food type were  
147 treated as random intercept terms

148

149 The models described in R terminology are as follows:

150

151 The observational feeding records model. Key: obs\_id=observation id, plant\_id= Plant genus,  
152 death\_year = year that chimpanzee died, mr\_content=Prevalence of starch in each plant  
153 species, wt= Milligrams in each sample, class\_rate=Rate of successful identification in this  
154 species.

155 Count of each plant species~ mins+ age+ sex+ (1|obs\_id)+ (1|plant\_id)+ (1|tooth)+  
156 (1|chimp\_name)+ (1|death\_year)+ (0+mins|chimp\_name)+ (0+mins|tooth)+ (0+  
157 mins|death\_year)+ (0+age|plant\_id)+ (0+age|tooth)+ offset(log(mr\_content)),  
158 weight=class\_rate+ calculus samples weight

159

160 In mathematical notation, the models are written as follows:

$$\begin{aligned} \log_e(\lambda) = & -n\lambda + \log_e(\lambda) \sum_{j=1}^p [\beta_{11j}\text{mins}_j + \beta_{12j}\text{age}_j + \beta_{13j}\text{sex}_j) + \beta_{21j} + u_{11j})\text{tooth}_j \\ & + (\beta_{22j} + u_{12j})\text{death\_year}_j + (\beta_{23j} + u_{13j})\text{plant\_id}_j + (\beta_{24j} + u_{14j})\text{age}_j \\ & - \sum_{j=1}^p \ln[\beta_{11j}\text{mins}_j + \beta_{12j}\text{age}_j + \beta_{13j}\text{sex}_j) + \beta_{21j} + u_{11j})\text{tooth}_j \\ & + (\beta_{22j} + u_{12j})\text{death\_year}_j + (\beta_{23j} + u_{13j})\text{plant\_id}_j + (\beta_{24j} + u_{14j})\text{age}_j]! \\ & + u_{01} + u_{02} + u_{03} + u_{04} + u_{05} + \varepsilon_j \end{aligned}$$

161

162

163

164 **References**

- 165 1. Perry, G. H. *et al.* Diet and the evolution of human amylase gene copy number variation.  
166 *Nat Genet* **39**, 1256–1260 (2007).
- 167 2. Fenwick, R. S. H., Lentfer, C. J. & Weisler, M. I. Palm reading: A pilot study to discriminate  
168 phytoliths of four Arecaceae (Palmae) taxa. *J. Archaeol. Sci.* **38**, 2190–2199 (2011).
- 169 3. Torrence, R., Wright, R. & Conway, R. Identification of starch granules using image  
170 analysis and multivariate techniques. *J. Archaeol. Sci.* **31**, 519–532 (2004).
- 171 4. N’guessan, A. K. Aspects quantitatifs et qualitatifs du régime alimentaire des chimpanzés  
172 au parc national de Taï, Côte d’Ivoire. (Universite de Cocody, 2012).
- 173 5. Oyebade, T. Some aspects of developmental physiology of the Nigerian kola (*Cola nitida*)  
174 fruit. *Econ. Bot.* **27**, 417–422 (1973).
- 175 6. Wilson, J. *et al.* Automated classification of starch granules using supervised pattern  
176 recognition of morphological properties. *J. Archaeol. Sci.* **37**, 594–604 (2010).
- 177 7. Zhang, J., Lu, H. & Huang, L. Calciphytoliths (calcium oxalate crystals) analysis for the  
178 identification of decayed tea plants (*Camellia sinensis* L.). *Sci. Rep.* **4**, 6703 (2014).
- 179 8. Coster, A. C. F. & Field, J. H. What starch grain is that? – A geometric morphometric  
180 approach to determining plant species origin. *J. Archaeol. Sci.* **58**, 9–25 (2015).
- 181 9. Saul, H. *et al.* A systematic approach to the recovery and identification of starches from  
182 carbonised deposits on ceramic vessels. *J. Archaeol. Sci.* **39**, 3483–3492 (2012).
- 183 10. Colliot, G., C, A. P. & Bonnet, N. in *The State-of-the-Art of Phytoliths in Soils and Plants*  
184 275 (1997).

185

186

187

188

189

190

191

192

193

194

195  
196  
197  
198  
199  
200  
201

**Supplementary Tables**

Supplementary Table 1: Details of the random forest model used to predict genus of origin for the phytolith-producing taxa. Identification rate = rate of successful identification per genus.

|                                                |                  |                        |               |                    |                      |                            |
|------------------------------------------------|------------------|------------------------|---------------|--------------------|----------------------|----------------------------|
| Number of variables tried at each split (mtry) |                  |                        |               |                    |                      | 15                         |
| Tune length                                    |                  |                        |               |                    |                      | 3                          |
| Tree number                                    |                  |                        |               |                    |                      | 500                        |
| Out of bag estimate of error rate              |                  |                        |               |                    |                      | 25.75%                     |
| Confusion matrix                               |                  |                        |               |                    |                      |                            |
|                                                | <i>Aframomum</i> | <i>Ancistrophyllum</i> | <i>Elaeis</i> | <i>Eremospatha</i> | <i>Sarcophrynium</i> | <i>Identification rate</i> |
| <i>Aframomum</i>                               | 39               | 3                      | 1             | 5                  | 2                    | 0.78                       |
| <i>Ancistrophyllum</i>                         | 3                | 32                     | 3             | 12                 | 0                    | 0.64                       |
| <i>Elaeis</i>                                  | 2                | 3                      | 40            | 5                  | 0                    | 0.8                        |
| <i>Eremospatha</i>                             | 5                | 11                     | 1             | 33                 | 0                    | 0.66                       |
| <i>Sarcophrynium</i>                           | 2                | 0                      | 1             | 0                  | 47                   | 0.94                       |

202  
203  
204  
205

Supplementary Table 2: Details of the random forest model used to predict genus of origin for the starch-producing taxa. Identification rate=rate of successful identification per genus.

|                                                |                  |                   |             |              |                    |                         |                  |              |              |                    |                      |                |               |                            |
|------------------------------------------------|------------------|-------------------|-------------|--------------|--------------------|-------------------------|------------------|--------------|--------------|--------------------|----------------------|----------------|---------------|----------------------------|
| Number of variables tried at each split (mtry) |                  |                   |             |              |                    |                         |                  |              |              |                    |                      |                |               | 14                         |
| Tune length                                    |                  |                   |             |              |                    |                         |                  |              |              |                    |                      |                |               | 3                          |
| Tree number                                    |                  |                   |             |              |                    |                         |                  |              |              |                    |                      |                |               | 500                        |
| Out of bag estimate of error rate              |                  |                   |             |              |                    |                         |                  |              |              |                    |                      |                |               | 32.77%                     |
| Confusion matrix                               |                  |                   |             |              |                    |                         |                  |              |              |                    |                      |                |               |                            |
|                                                | <i>Aframomum</i> | <i>Calpocalyx</i> | <i>Cola</i> | <i>Coula</i> | <i>Eremospatha</i> | <i>Gilbertiodendron</i> | <i>Napoleona</i> | <i>Panda</i> | <i>Piper</i> | <i>Sacoglottis</i> | <i>Sarcophrynium</i> | <i>Treulia</i> | <i>Xylica</i> | <i>Identification rate</i> |
| <i>Aframomum</i>                               | 45               | 1                 | 0           | 0            | 0                  | 0                       | 0                | 0            | 2            | 0                  | 0                    | 1              | 1             | 0.9                        |
| <i>Calpocalyx</i>                              | 0                | 40                | 0           | 0            | 7                  | 0                       | 0                | 2            | 0            | 0                  | 0                    | 0              | 1             | 0.8                        |
| <i>Cola</i>                                    | 0                | 0                 | 26          | 0            | 0                  | 3                       | 0                | 2            | 0            | 5                  | 0                    | 11             | 3             | 0.52                       |
| <i>Coula</i>                                   | 0                | 0                 | 0           | 44           | 3                  | 0                       | 0                | 0            | 0            | 2                  | 0                    | 0              | 1             | 0.88                       |
| <i>Eremospatha</i>                             | 0                | 10                | 0           | 0            | 31                 | 0                       | 0                | 7            | 0            | 0                  | 0                    | 0              | 2             | 0.62                       |
| <i>Gilbertiodendron</i>                        | 0                | 0                 | 4           | 0            | 0                  | 38                      | 1                | 0            | 0            | 7                  | 0                    | 0              | 0             | 0.76                       |
| <i>Napoleona</i>                               | 0                | 2                 | 0           | 0            | 1                  | 1                       | 18               | 7            | 0            | 2                  | 0                    | 8              | 11            | 0.36                       |
| <i>Panda</i>                                   | 0                | 3                 | 1           | 0            | 6                  | 0                       | 11               | 11           | 0            | 0                  | 0                    | 6              | 12            | 0.22                       |
| <i>Piper</i>                                   | 2                | 0                 | 0           | 0            | 0                  | 0                       | 0                | 0            | 47           | 1                  | 0                    | 0              | 0             | 0.94                       |

|                      |   |   |   |   |   |   |   |   |   |    |    |    |    |      |
|----------------------|---|---|---|---|---|---|---|---|---|----|----|----|----|------|
| <i>Sacoglottis</i>   | 0 | 0 | 0 | 0 | 0 | 6 | 0 | 0 | 0 | 43 | 0  | 0  | 1  | 0.86 |
| <i>Sarcophrynium</i> | 0 | 0 | 0 | 0 | 0 | 2 | 0 | 0 | 1 | 0  | 47 | 0  | 0  | 0.94 |
| <i>Treculia</i>      | 0 | 0 | 7 | 0 | 0 | 2 | 4 | 6 | 0 | 1  | 0  | 26 | 4  | 0.52 |
| <i>Xylia</i>         | 0 | 3 | 0 | 0 | 6 | 0 | 7 | 7 | 0 | 3  | 0  | 3  | 21 | 0.42 |

206  
207  
208  
209  
210  
211  
212  
213

Supplementary Table 3: Table of total recovered plant microremains, both in the full sample and per milligram of calculus with cause of death of the sampled chimpanzees, condition of their dental calculus and skeleton treatment a) Buried for unknown duration, cleaned and dried (1984-1994, 1996-2004 b) Necropsy, burial for 1 year, possible boiling and dried (1994-1996) and c) Necropsy, burial for 1 year, disinfection with chlorine, 10% formalin and dried (2004-onwards).

| Name     | Phy | Phy/mg | Starch | Starch/mg | Unsilicified/mg | Unsilicified remains | Cause of death  | Calculus condition | Skeleton treatment |
|----------|-----|--------|--------|-----------|-----------------|----------------------|-----------------|--------------------|--------------------|
| Ophelia  | 0   | 0      | 1      | 40        | 0               | 0                    | Pneumonia       | White              | C                  |
| Leonardo | 0   | 0      | 0      | 0         | 0               | 0                    | Starvation      | White/grey         | A                  |
| Bambou   | 0   | 0      | 0      | 0         | 1               | 7.41                 | Tree fall       | White              | A                  |
| Piment   | 0   | 0      | 0      | 0         | 0               | 0                    | Ebola           | White              | B                  |
| Oreste   | 40  | 74.63  | 4      | 7.46      | 1               | 1.87                 | Pneumonia       | Grey               | C                  |
| Hector   | 24  | 34.83  | 2      | 2.9       | 6               | 8.71                 | Anthrax         | Orange             | A                  |
| Noah     | 47  | 52.51  | 2      | 2.23      | 32              | 35.75                | Unknown         | Brownish           | A                  |
| Lefkas   | 19  | 31.93  | 11     | 18.49     | 13              | 21.85                | Pneumonia       | White              | A                  |
| Tina     | 29  | 21.21  | 8      | 5.85      | 6               | 4.39                 | Leopard         | Brownish           | A                  |
| Dorry    | 159 | 214.29 | 5      | 6.74      | 4               | 5.39                 | Unknown         | White              | A                  |
| Zerlina  | 147 | 167.43 | 0      | 0         | 9               | 10.25                | Ebola?          | Moderate           | B                  |
| Clyde    | 27  | 23.87  | 4      | 3.54      | 3               | 2.65                 | Poacher         | White              | A                  |
| Agathe   | 94  | 15.47  | 13     | 2.14      | 22              | 3.62                 | Ebola?          | Brown/creamy       | A                  |
| Bijou    | 87  | 17.26  | 10     | 1.98      | 22              | 4.36                 | Unknown disease | Brownish           | A                  |
| Leo      | 126 | 116.13 | 5      | 4.61      | 9               | 8.29                 | Unknown         | Brownish           | A                  |
| Castor   | 65  | 9.31   | 25     | 3.58      | 6               | 0.86                 | Pneumonia       | White              | A                  |
| Fanny    | 109 | 27.84  | 54     | 13.79     | 11              | 2.81                 | Ebola?          | White brown        | B                  |
| Kendo    | 233 | 235.59 | 0      | 0         | 25              | 25.28                | Ebola?          | Grey               | B                  |
| Venus    | 96  | 59.26  | 16     | 9.88      | 2               | 1.23                 | Unknown         | Brownish           | C                  |
| Goma     | 98  | 7.42   | 181    | 13.7      | 17              | 1.29                 | Anthrax         | White              | A                  |
| Rubra    | 120 | 17.78  | 10     | 1.48      | 30              | 4.44                 | Anthrax?        | Mixed/white        | C                  |
| Ondine   | 26  | 17     | 0      | 0         | 10              | 6.54                 | Ebola?          | Brown/green        | A                  |
| Mkubwa   | 11  | 33.95  | 0      | 0         | 1               | 3.09                 | Unknown         | Whitish green      | A                  |
| Brutus   | 161 | 49.6   | 5      | 1.54      | 25              | 7.7                  | Unknown         | Brownish           | a                  |

214



215  
216  
217

Supplementary Table 4: Summary counts of identified genera in Tai Chimpanzee calculus samples.

| Name     | Phytolith    |                   | Starch       |                   |
|----------|--------------|-------------------|--------------|-------------------|
|          | Genera count | % of total genera | Genera count | % of total genera |
| Ophelia  | 0            | 0                 | 0            | 0                 |
| Leonardo | 0            | 0                 | 0            | 0                 |
| Bambou   | 0            | 0                 | 0            | 0                 |
| Piment   | 0            | 0                 | 0            | 0                 |
| Oreste   | 5            | 100               | 2            | 15.38             |
| Hector   | 3            | 60                | 2            | 15.38             |
| Noah     | 5            | 100               | 0            | 0.00              |
| Lefkas   | 2            | 40                | 4            | 30.77             |
| Tina     | 3            | 60                | 2            | 15.38             |
| Dorry    | 4            | 80                | 3            | 23.08             |
| Zerlina  | 4            | 80                | 0            | 0                 |
| Clyde    | 3            | 60                | 3            | 23.08             |
| Agathe   | 4            | 80                | 4            | 30.77             |
| Bijou    | 5            | 100               | 5            | 38.46             |
| Leo      | 4            | 80                | 2            | 15.38             |
| Castor   | 5            | 100               | 3            | 23.08             |
| Fanny    | 4            | 80                | 10           | 76.92             |
| Kendo    | 5            | 100               | 0            | 0.00              |
| Venus    | 4            | 80                | 5            | 38.46             |
| Goma     | 5            | 100               | 9            | 69.23             |
| Rubra    | 5            | 100               | 5            | 38.46             |
| Ondine   | 3            | 60                | 0            | 0.00              |
| Mkubwa   | 2            | 40                | 0            | 0.00              |
| Brutus   | 5            | 100               | 3            | 23.08             |

218  
219  
220

Supplementary Table 5: Summary of coefficients of our statistical models.

| Model                                                 | Term      | Estimate | Std. Err. | Z value | P           |
|-------------------------------------------------------|-----------|----------|-----------|---------|-------------|
| Tests of effect of age and sex on microremain numbers |           |          |           |         |             |
| Phytolith Negative binomial                           | Intercept | 3.969    | 0.160     | 24.790  | 1.1398e-135 |
|                                                       | Age       | 0.002    | 0.0005    | 3.833   | 1.2616e-04  |
|                                                       | Sex       | -0.027   | 0.157     | -0.170  | 8.6469e-01  |
| Starch Negative binomial                              | Intercept | 3.009    | 0.426     | 7.052   | 1.7575e-12  |
|                                                       | Age       | 0.003    | 0.001     | 2.661   | 7.7805e-03  |
|                                                       | Sex       | -2.569   | 0.437     | -5.873  | 4.2665e-09  |
| Unsilicified remains                                  | Intercept | 2.210    | 0.202     | 10.904  | 1.0978e-27  |

|                                                                 |           |             |           |           |            |
|-----------------------------------------------------------------|-----------|-------------|-----------|-----------|------------|
| Negative binomial                                               | Age       | 0.001       | 0.0006    | 3.093     | 1.9775e-03 |
|                                                                 | Sex       | -0.048      | 0.199     | -0.245    | 8.0594e-01 |
| Tests of effect of consumption frequency on microremain numbers |           |             |           |           |            |
| Phytolith poisson model                                         | Intercept | -0.231      | 0.876     | -0.263    | 0.791      |
|                                                                 | z.min     | 1.707       | 0.680     | 2.509     | 0.0120     |
|                                                                 | z.age     | 3.612       | 2.075     | 1.740     | 0.081      |
|                                                                 | sex       | -0.801      | 0.934     | -0.858    | 0.390      |
| Starch logistic regression model                                | Intercept | -14.2189228 | 0.8709593 | -6.325589 | 6.4911e-60 |
|                                                                 | z.min     | 0.5912703   | 0.5056228 | 1.169390  | 2.4224e-01 |
|                                                                 | z.age     | 0.4893117   | 0.4425319 | 1.105709  | 2.6885e-01 |
|                                                                 | sex       | -1.2664400  | 0.9964118 | -1.271001 | 2.0372e-01 |

221  
222  
223  
224  
225  
226  
227

Supplementary Table 6: Complete inventory of plants and fungus analysed in reference collection. x=no microremain found. o=microremains found and used for identification model. 1=found but not used in classification model due to their complex morphology, 2=found but not included as they are very rare, 3=found but only in parts that are not eaten. Prep=preparation. d=dried, fn=frozen and fh=fresh.

|                      |                                                             | Leaf   | Fruit pulp | Seed | Stem | Pith | Shell | Flower | USO | Bark | Leaf | Fruit pulp | Seed | Stem | Pith | Shell | Flower | USO | Bark | Prep |
|----------------------|-------------------------------------------------------------|--------|------------|------|------|------|-------|--------|-----|------|------|------------|------|------|------|-------|--------|-----|------|------|
| <b>Plants</b>        |                                                             |        |            |      |      |      |       |        |     |      |      |            |      |      |      |       |        |     |      |      |
| Genus                | Species                                                     | Starch |            |      |      |      |       |        |     |      |      | Phytoliths |      |      |      |       |        |     |      |      |
| <i>Aframomum</i>     | <i>exscapum</i> (Sims) Hepper                               | x      |            | x    |      |      |       |        |     |      |      |            |      |      |      |       |        |     |      | d    |
| <i>Aframomum</i>     | <i>cereum</i> (Hook.f.) K.Schum.                            |        |            |      |      |      |       |        |     |      | x    |            | x    |      |      |       |        |     |      | d    |
| <i>Afzelia</i>       | <i>bella</i> Harms                                          |        |            |      |      |      |       |        |     |      | 1    |            |      |      |      |       |        |     |      | d    |
| <i>Agaricus</i>      | <i>bispourus</i> (J.E.Lange) Emil J. Imbach                 |        |            |      | x    |      |       |        |     |      |      |            |      |      |      |       |        |     |      | d    |
| <i>Anchomanes</i>    | <i>difformis</i> (Bl.) Engl.                                |        |            |      |      |      |       |        |     |      |      |            |      | x    |      |       |        |     |      | fn   |
| <i>Antiaris</i>      | <i>toxicaria</i> subsp. <i>welwitschii</i> (Engl.) C.C.Berg |        | x          | 2    |      |      |       |        |     |      |      |            |      |      |      |       |        |     |      | d    |
| <i>Auricularia</i>   | <i>auricula-judae</i> . (Bull.) J.Schröt.                   |        |            |      | x    |      |       |        |     |      |      |            |      | x    |      |       |        |     |      | d    |
| <i>Beilschmiedia</i> | <i>mannii</i> (Meisn.) Benth. & Hook.f.                     |        |            | 2    |      |      |       |        |     |      |      |            |      |      |      |       |        |     |      | d    |
| <i>Bombax</i>        | <i>buonopozense</i> P.Beauv.                                |        |            | x    |      |      |       |        |     |      |      |            |      |      |      |       |        |     |      | d    |
| <i>Bombax</i>        | <i>ceiba</i> L.                                             | x      |            |      |      |      |       |        |     |      | 2    |            |      |      |      |       |        |     |      | fh   |
| <i>Calpocalyx</i>    | <i>Sp.</i>                                                  |        | o          |      |      |      |       |        |     |      |      |            |      |      |      |       |        |     |      | d    |
| <i>Calpocalyx</i>    | <i>aubrevillei</i> Pellegr.                                 | x      |            |      |      |      |       |        |     |      | x    |            |      |      |      |       |        |     |      | d    |
| <i>Canarium</i>      | <i>schweinfurtii</i> Engl.                                  |        | x          | x    |      |      |       |        |     |      |      |            |      |      |      |       |        |     |      | fn   |
| <i>Castanola</i>     | <i>paradoxa</i> (Gilg)                                      |        |            |      |      |      |       |        |     |      |      | x          | x    |      |      |       |        |     |      | d    |









235 Supplementary Table 8: Variable importance in phytolith random forest.

| Variable               | Importance |
|------------------------|------------|
| Length                 | 100.00     |
| Spine number           | 75.301     |
| Spine ang              | 74.109     |
| LW Ratio               | 43.996     |
| Spine length           | 42.854     |
| Area                   | 29.581     |
| Width                  | 22.056     |
| Irregul                | 10.236     |
| Spherical              | 6.667      |
| Angularpoint           | 6.575      |
| Polygon                | 4.590      |
| Ovoid                  | 1.663      |
| Prolate                | 1.620      |
| Triangular             | 1.447      |
| Elongate               | 0.440      |
| Quadrangular           | 0.228      |
| Facets                 | 0.184      |
| Conjoined              | 0.106      |
| Prolate concave-convex | 0.043      |
| Polygon concave        | 0.042      |

236

237

238 Supplementary Table 9: Variable importance in starch random forest.

| Variable        | Importance |
|-----------------|------------|
| Area            | 100        |
| Length          | 75.8434    |
| Width           | 67.5876    |
| Dist            | 61.1718    |
| Facets          | 60.4963    |
| LW Ratio        | 56.2298    |
| Type            | 55.9587    |
| Lam             | 35.8372    |
| Spherical       | 31.833     |
| Prolate         | 8.2554     |
| Ovoid           | 7.157      |
| Polygon         | 5.8693     |
| Hemispherical   | 4.9279     |
| Oblate conovoid | 4.6926     |
| Striaelen       | 2.4395     |
| Elongate ovoid  | 2.4011     |
| Striae no       | 2.1051     |
| Triangular      | 1.8956     |
| Quadrangular    | 0.9141     |
| Pyriform        | 0.4986     |

239

240

241

242 **Supplementary Figures**

243



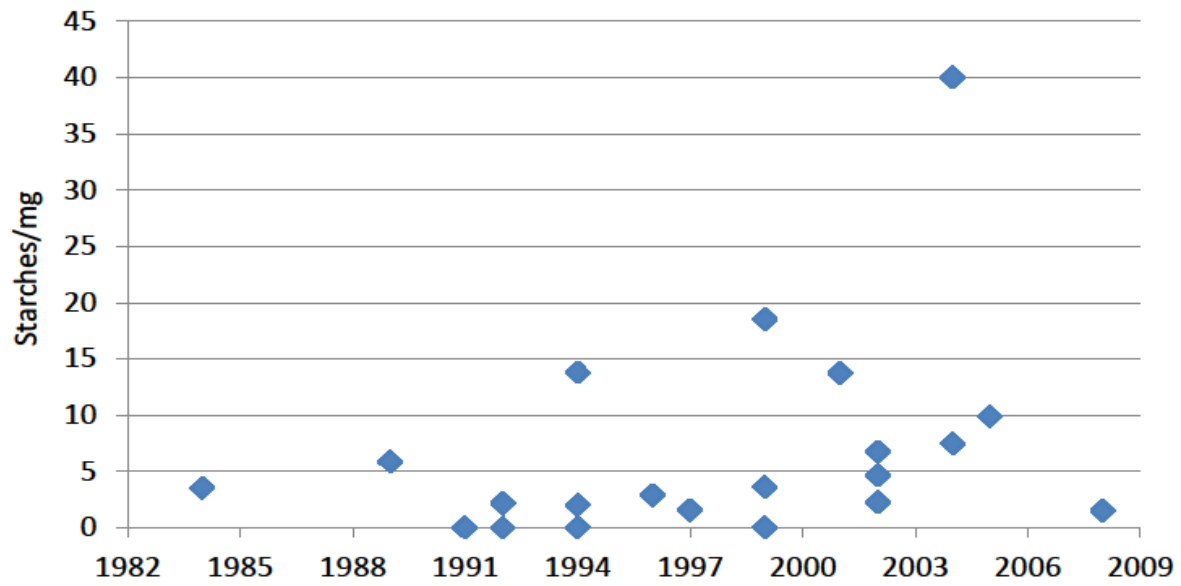

244  
245 Supplementary Figure 1: Scatter plot of starches per mg in each chimpanzee calculus samples  
246 and year of chimpanzee death. Starches /mg includes the possible starch microremain category.  
247 Treatment of the skeletal remains and year of chimpanzee death does not predict variation of  
248 starches per mg.  
249  
250

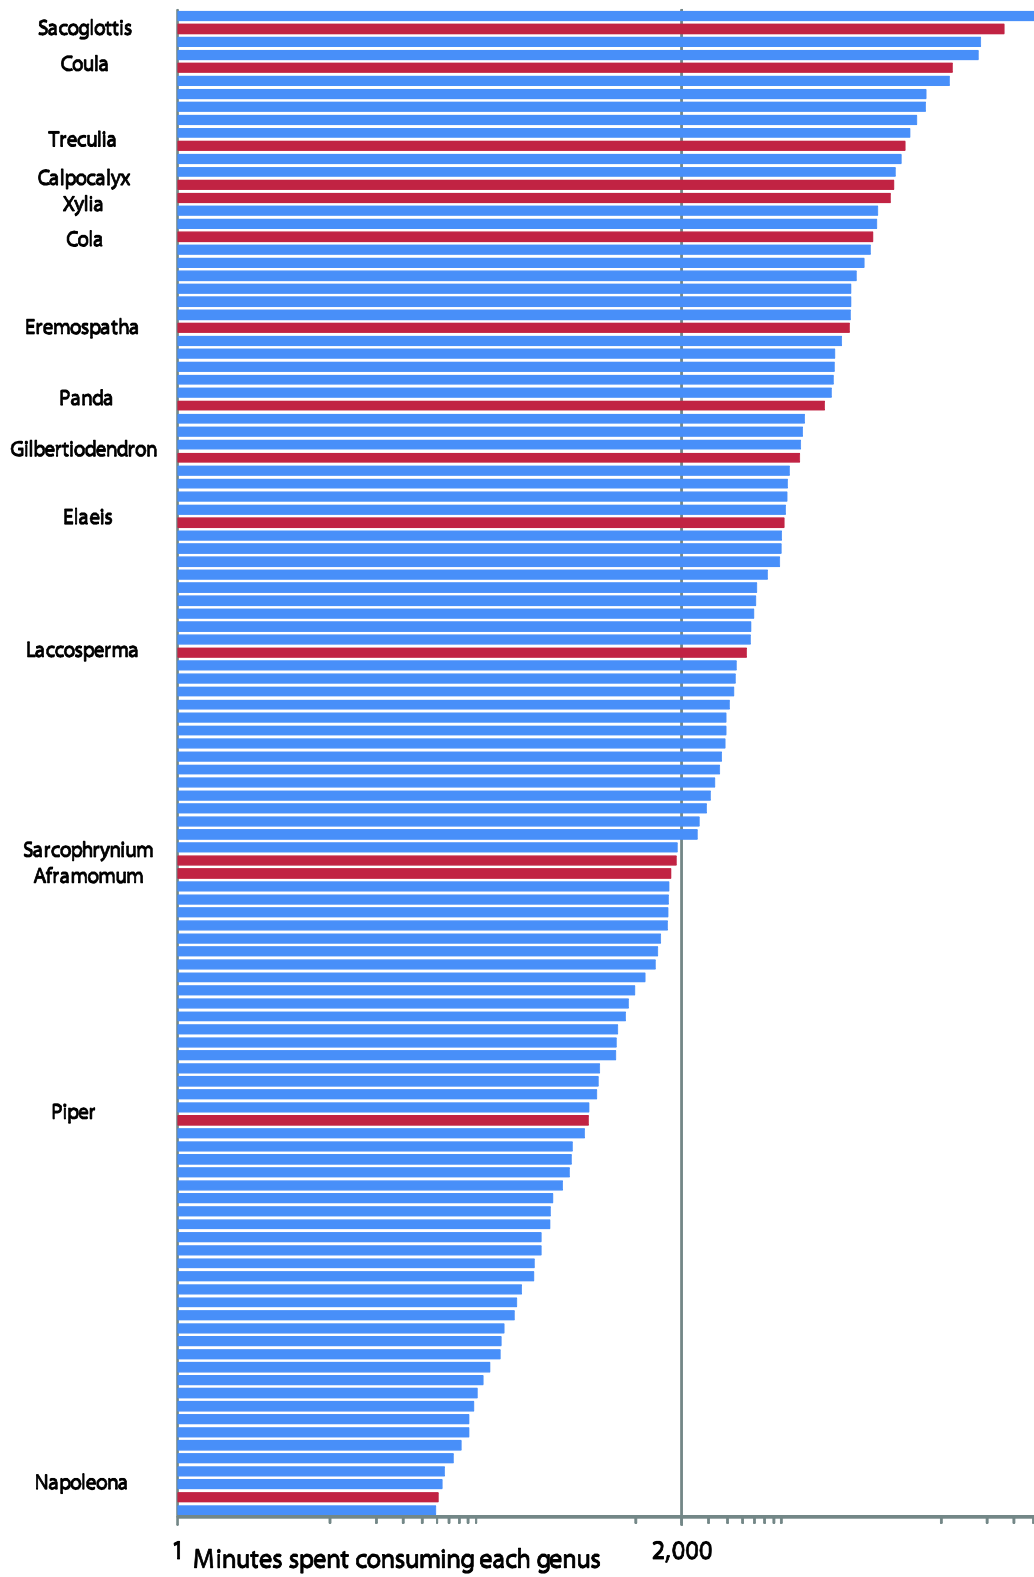

251

252

253

Supplementary Figure 2: Bar chart of chimpanzee plant foods, ranked by the number of minutes each was consumed. Plants in random forest model are in red and those that are not

254 are in blue. Chart omits foods eaten for <40 minutes. Our sample includes plants that are  
255 frequently consumed (e.g. *Sacoglottis* and *Coula*) as well as those less often eaten (e.g. *Piper*  
256 and *Napoleona*).

257

258

259
